# Supplementary material for: Application of a novel cascade-routing and reinfiltration concept with a Voronoi unstructured grid in MODFLOW 6, for an assessment of surface-water/groundwater interactions in a hard-rock catchment (Sardon, Spain)
Source: Springer Nature journal article supplement (doi:10.1007/s10040-021-02430-z), 2022-03-03
Supplement: MOESM1 [file 20190814]

## Electronic supplementary material – Hydrogeology Journal

Application of a novel cascade-routing and reinfiltration concept with a Voronoi unstructured grid in MODFLOW 6, for an assessment of surface-water/groundwater interactions in a hard-rock catchment (Sardon, Spain)

### Authors

Mostafa Gomaa Daoud<sup>1</sup>, Maciek W. Lubczynski<sup>1</sup>, Zoltan Vekerdy<sup>1,2</sup>, Alain Pascal Francés<sup>3</sup>

1. Department of Water Resources, Faculty of Geo-Information Science and Earth Observation (ITC), University of Twente, PO Box 217, 7500 AE Enschede, The Netherlands

Email: [m.g.m.daoud@utwente.nl](mailto:m.g.m.daoud@utwente.nl), [m.w.lubczynski@utwente.nl](mailto:m.w.lubczynski@utwente.nl), [z.vekerdy@utwente.nl](mailto:z.vekerdy@utwente.nl)

2. Department of Water Management and Climate Adaptation, Institute of Environmental Sciences, Hungarian University of Agriculture and Life Sciences, Páter Károly u. 1., 2100 Gödöllő, Hungary

Email: [vekerdy.zoltan@uni-mate.hu](mailto:vekerdy.zoltan@uni-mate.hu)

3. LNEG - Laboratório Nacional de Energia e Geologia, Apartado 7586, Alfragide, 2610-999 Amadora, Portugal

Email: [alain.frances@lneg.pt](mailto:alain.frances@lneg.pt)

**Table S1** List of abbreviations and symbols

|                                |                                                                                                   |
|--------------------------------|---------------------------------------------------------------------------------------------------|
| $\alpha_{i,j}$                 | Fraction of flow from the cell $i$ to the neighbouring $j$ cell                                   |
| $a_i$                          | Land-cover class coverage fraction over the total catchment area for the calculations of $E_{sf}$ |
| $\beta_{i,j}$                  | Flow partitioning factor used in model calibration                                                |
| $b_i$                          | Land-cover class coverage fraction over the total catchment area for the calculations of PET      |
| $c$                            | Fractional canopy cover                                                                           |
| $\Delta S$                     | Total catchment storage                                                                           |
| $\Delta S_g$                   | Groundwater zone storage                                                                          |
| $\Delta S_u$                   | Unsaturated zone storage                                                                          |
| $d_{ext}$                      | Extinction depth                                                                                  |
| $d_{surf}$                     | Surface depth at which groundwater exfiltration can start                                         |
| elv                            | Land surface elevation                                                                            |
| $E_g$                          | Groundwater evaporation                                                                           |
| $E_s$                          | Surface evaporation                                                                               |
| $E_l$                          | Canopy interception                                                                               |
| ET                             | Evapotranspiration                                                                                |
| ET <sub>g</sub>                | Groundwater evapotranspiration                                                                    |
| ET <sub>o</sub>                | Reference evapotranspiration                                                                      |
| ET <sub>oc</sub>               | Reference evapotranspiration per unit area of canopy cover                                        |
| ET <sub>ss</sub>               | Subsurface evapotranspiration                                                                     |
| ET <sub>u</sub>                | Unsaturated zone evapotranspiration                                                               |
| Exf <sub>gw</sub>              | Groundwater exfiltration                                                                          |
| Exf <sub>gw</sub> <sup>e</sup> | Evaporated groundwater exfiltration                                                               |
| Exf <sub>gw</sub> <sup>i</sup> | Reinfiltrated groundwater exfiltration                                                            |
| Exf <sub>gw</sub> <sup>r</sup> | Groundwater exfiltration transferred down-gradient as runoff                                      |
| Exf <sub>gw</sub> <sup>s</sup> | Groundwater exfiltration routed to streams                                                        |
| $I$                            | Net infiltration                                                                                  |
| $I_a$                          | Active infiltration                                                                               |

|                              |                                                                               |
|------------------------------|-------------------------------------------------------------------------------|
| $K_b$                        | Hydraulic conductivity of stream reach's bed                                  |
| $K_c$                        | Crop coefficient                                                              |
| $K_{cb}$                     | Transpiration crop coefficient                                                |
| $K_e$                        | Soil evaporation crop coefficient                                             |
| $K_h$                        | Horizontal hydraulic conductivity                                             |
| $K_{sat}$                    | Saturated vertical hydraulic conductivity                                     |
| $K_v$                        | Vertical hydraulic conductivity                                               |
| LAI                          | Leaf area index                                                               |
| $l_{i,j}$                    | Distance between the centres of the connected $i$ and $j$ cells               |
| $P$                          | Precipitation                                                                 |
| $P_e$                        | Effective precipitation                                                       |
| PET                          | Potential evapotranspiration                                                  |
| $q$                          | Total stream outflow at the catchment outlet                                  |
| $q_B$                        | Baseflow                                                                      |
| $q_g$                        | Lateral groundwater outflow                                                   |
| $q_{gs}$                     | Groundwater leakage to streams                                                |
| $Q.i.$                       | <i>Quercus ilex</i>                                                           |
| $Q.p.$                       | <i>Quercus pyrenaica</i>                                                      |
| $q_{sg}$                     | Stream leakage to groundwater                                                 |
| $\bar{R}$                    | Mean rainfall intensity                                                       |
| $RE^i = (RI^i + Exf_{gw}^i)$ | Total reinfiltreated water originated from the sum of $RI^i$ and $Exf_{gw}^i$ |
| $RE_{net}^i = RE^i - RI^r$   | Net total reinfiltreated water                                                |
| $RE^s = (RI^s + Exf_{gw}^s)$ | Direct runoff originated from the sum of $RI^s$ and $Exf_{gw}^s$              |
| $R_g$                        | Gross groundwater recharge                                                    |
| RI                           | Rejected infiltration                                                         |
| $RI^e$                       | Rejected infiltration evaporated                                              |
| $RI^i$                       | Rejected infiltration reinfiltreated                                          |
| $RI^r$                       | Rejected infiltration transferred down-gradient as runoff                     |
| $RI_{net}^r = RI^r - RE^i$   | Net rejected infiltration transferred down-gradient                           |

|                  |                                                       |
|------------------|-------------------------------------------------------|
| $RI^s$           | Rejected infiltration routed to streams               |
| $R_n$            | Net groundwater recharge                              |
| $S$              | Canopy storage capacity                               |
| SAVI             | Soil adjusted vegetation index                        |
| $S_c$            | Canopy storage capacity per unit area of canopy cover |
| $S_{i,j}$        | Slope gradient between cell $i$ and $j$               |
| $S_s$            | Specific storage                                      |
| $S_y$            | Specific yield                                        |
| $\theta_i$       | Initial water content                                 |
| $\theta_{ext}$   | Extinction water content                              |
| $\theta_{resid}$ | Residual water content                                |
| $\theta_{sat}$   | Saturated water content                               |

**Table S2** Average monthly  $K_e$  and  $K_{cb}$  of the hydrological year 2010 for the land cover classes

| Land cover | Grass/bare soil |           | Outcrops |           | $Q.i.$   |             | $Q.p.$   |             |          |           |          |           |
|------------|-----------------|-----------|----------|-----------|----------|-------------|----------|-------------|----------|-----------|----------|-----------|
| class      |                 |           |          |           | on soil  | on outcrops | on soil  | on outcrops |          |           |          |           |
| $b_i$ [-]  | 0.695           |           | 0.212    |           | 0.036    | 0.009       | 0.035    | 0.013       |          |           |          |           |
| Month      | $K_{e1}$        | $K_{cb1}$ | $K_{e2}$ | $K_{cb2}$ | $K_{e3}$ | $K_{cb3}$   | $K_{e4}$ | $K_{cb4}$   | $K_{e5}$ | $K_{cb5}$ | $K_{e6}$ | $K_{cb6}$ |
| Oct-09     | 0.14            | 0.22      | 0.07     | 0.00      | 0.00     | 0.70        | 0.00     | 0.73        | 0.00     | 0.63      | 0.00     | 0.56      |
| Nov-09     | 0.43            | 0.28      | 0.22     | 0.00      | 0.00     | 0.82        | 0.00     | 0.78        | 0.00     | 0.75      | 0.00     | 0.67      |
| Dec-09     | 0.53            | 0.29      | 0.26     | 0.00      | 0.00     | 0.95        | 0.00     | 0.84        | 0.00     | 0.88      | 0.00     | 0.79      |
| Jan-10     | 0.40            | 0.49      | 0.20     | 0.00      | 0.00     | 1.06        | 0.00     | 1.01        | 0.00     | 1.04      | 0.00     | 0.88      |
| Feb-10     | 0.50            | 0.43      | 0.25     | 0.00      | 0.00     | 1.15        | 0.00     | 1.11        | 0.00     | 1.04      | 0.00     | 0.97      |
| Mar-10     | 0.53            | 0.41      | 0.27     | 0.00      | 0.00     | 1.19        | 0.00     | 1.13        | 0.00     | 1.11      | 0.00     | 1.03      |
| Apr-10     | 0.60            | 0.38      | 0.30     | 0.00      | 0.00     | 1.29        | 0.00     | 1.25        | 0.00     | 1.22      | 0.00     | 1.19      |
| May-10     | 0.27            | 0.63      | 0.13     | 0.00      | 0.00     | 1.25        | 0.00     | 1.19        | 0.00     | 1.17      | 0.00     | 1.16      |
| Jun-10     | 0.30            | 0.41      | 0.15     | 0.00      | 0.00     | 1.15        | 0.00     | 1.13        | 0.00     | 1.14      | 0.00     | 1.13      |
| Jul-10     | 0.07            | 0.33      | 0.04     | 0.00      | 0.00     | 0.85        | 0.00     | 0.97        | 0.00     | 1.11      | 0.00     | 1.00      |
| Aug-10     | 0.11            | 0.19      | 0.06     | 0.00      | 0.00     | 0.55        | 0.00     | 0.78        | 0.00     | 1.00      | 0.00     | 0.85      |
| Sep-10     | 0.32            | 0.20      | 0.16     | 0.00      | 0.00     | 0.54        | 0.00     | 0.71        | 0.00     | 0.93      | 0.00     | 0.82      |

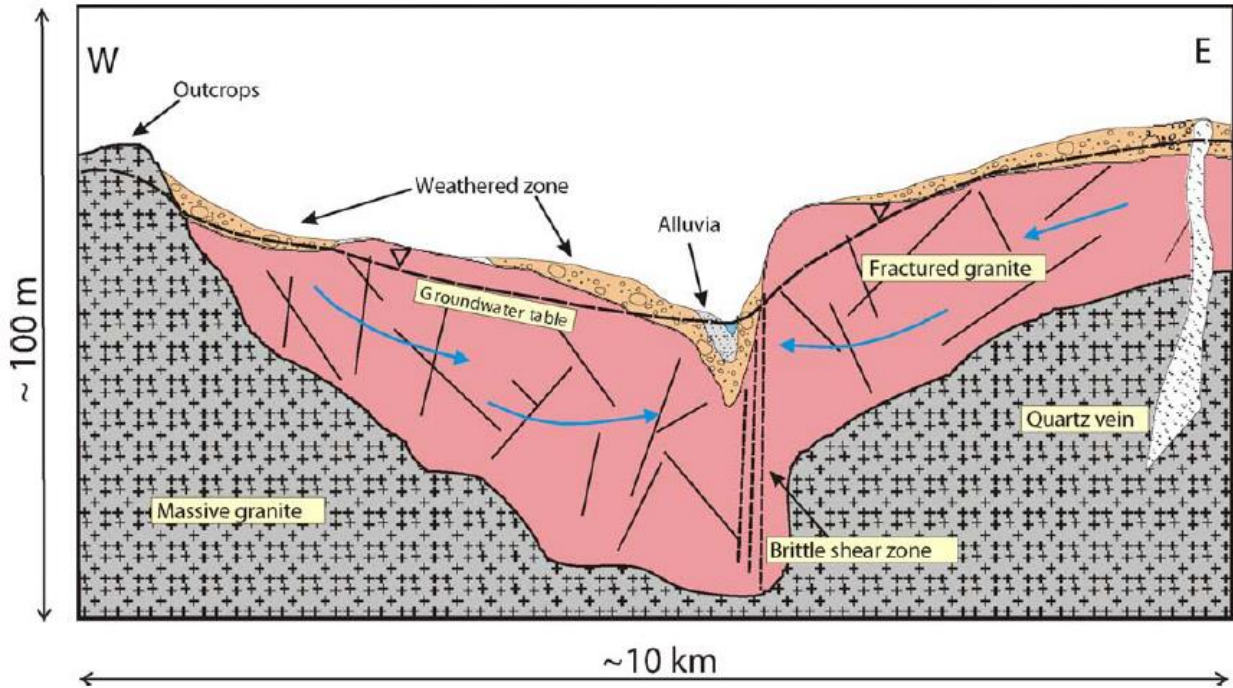

Fig. S1 Schematic cross-section after Lubczynski & Gurwin (2005)

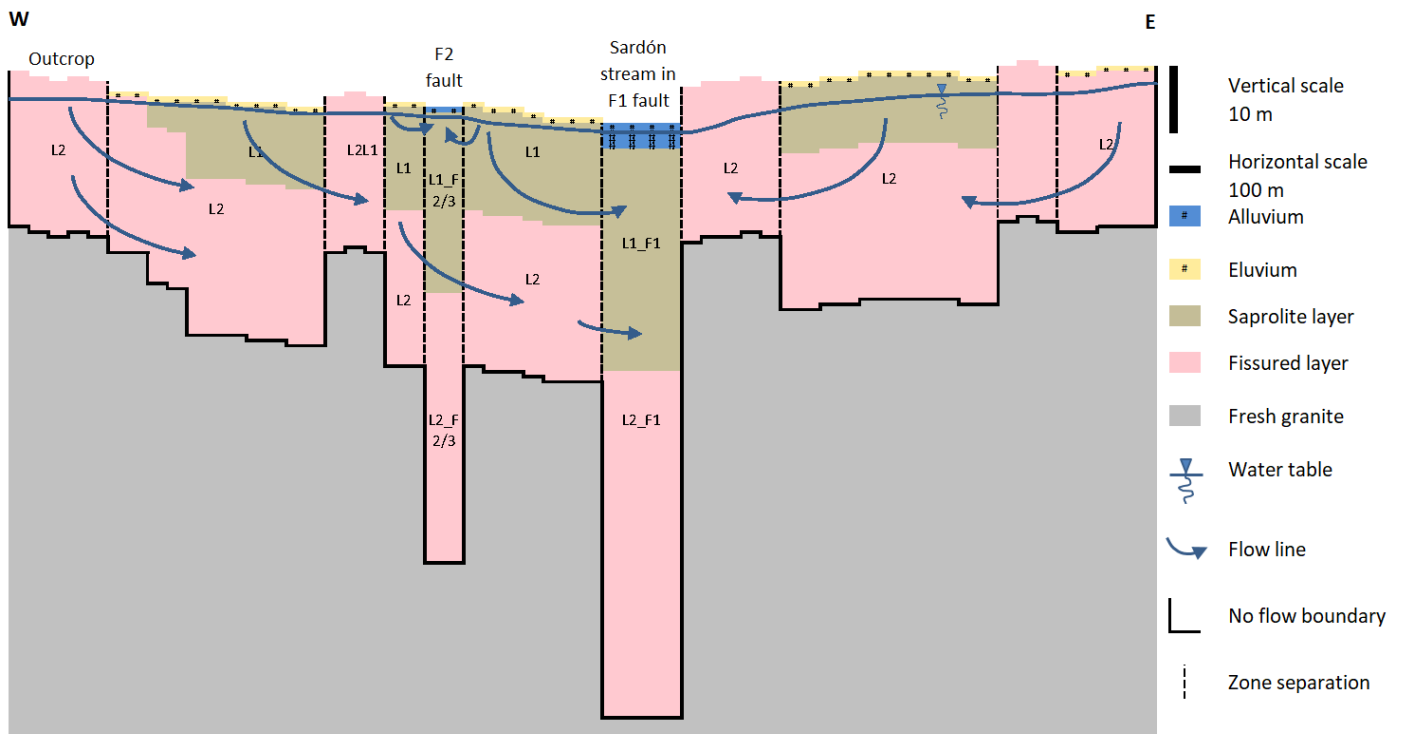

Fig. S2 Schematic cross-section after Francés et al. (2014)

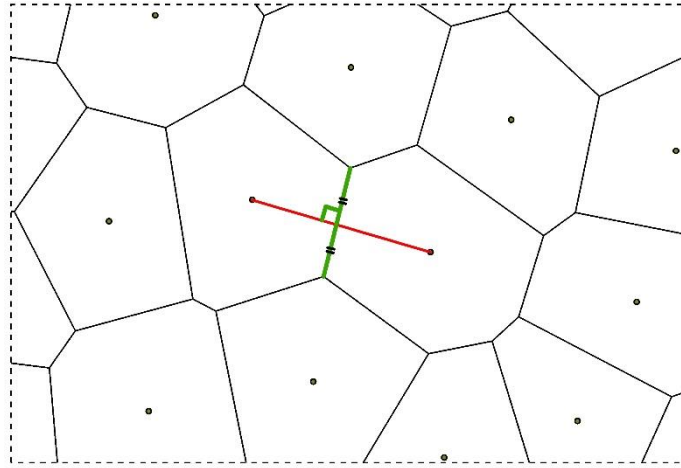

**Fig. S3** CVFD requirements. The red line connecting the centers of the two cells should (1) intersect the shared edge at the right angle (*highlighted by the green line and the green angle symbols respectively*), and (2) bisect the shared edge (*highlighted by the equality signs*)

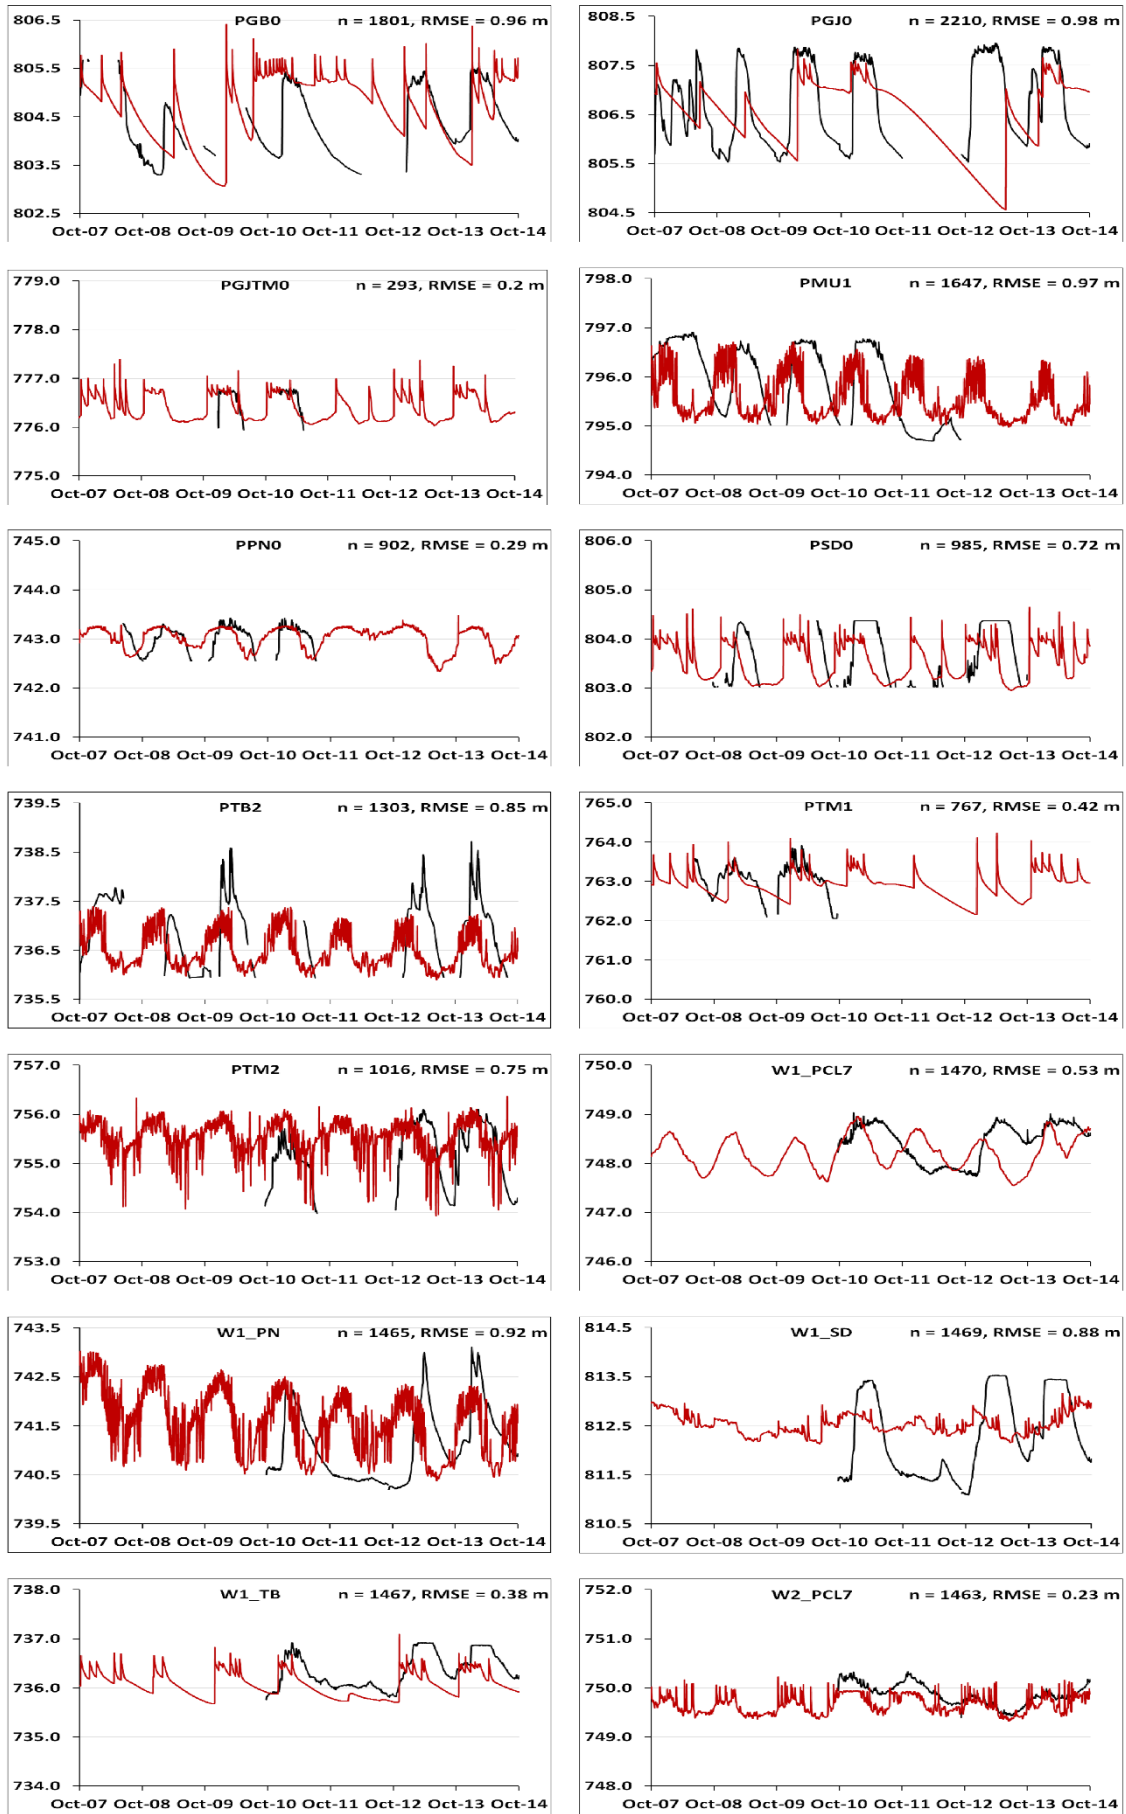

**Fig. S4** Groundwater hydrographs: the simulated heads (*red lines*) versus the observed heads (*black lines*) at the 14 observation points within the study period (1 October 2007 – 30 September 2014); *n* is the number of daily records while RMSE is the root mean square error between simulated and observed heads; the locations of the head observation points are presented in Fig. 1 of the main article



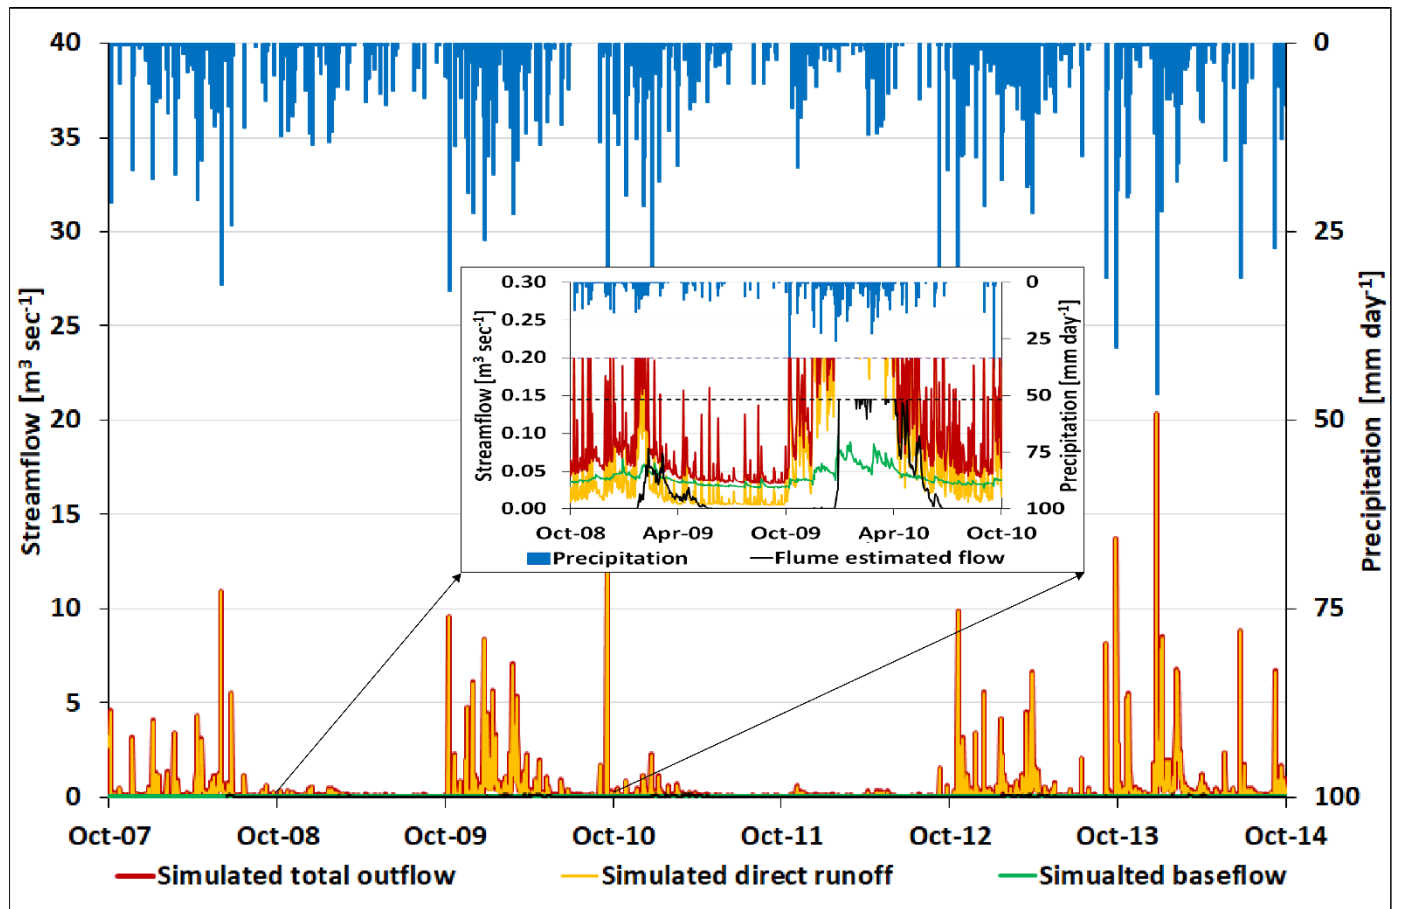

**Fig. S5** Components of Sardon catchment daily outflow versus precipitation presented for the seven hydrological years studied, i.e. from 1 October 2007 to 30 September 2014; the zoom window presents flows in the dry year 2009 and in the wet year 2010. Note: (i) the flume-estimated flow is limited to  $0.145 \text{ m}^3 \text{ s}^{-1}$ , as marked by *black dash horizontal line* and (ii) simulated total flow, and direct runoff are graphically restricted by *purple dash horizontal line* to  $< 0.2 \text{ m}^3 \text{ s}^{-1}$  for visualization purposes

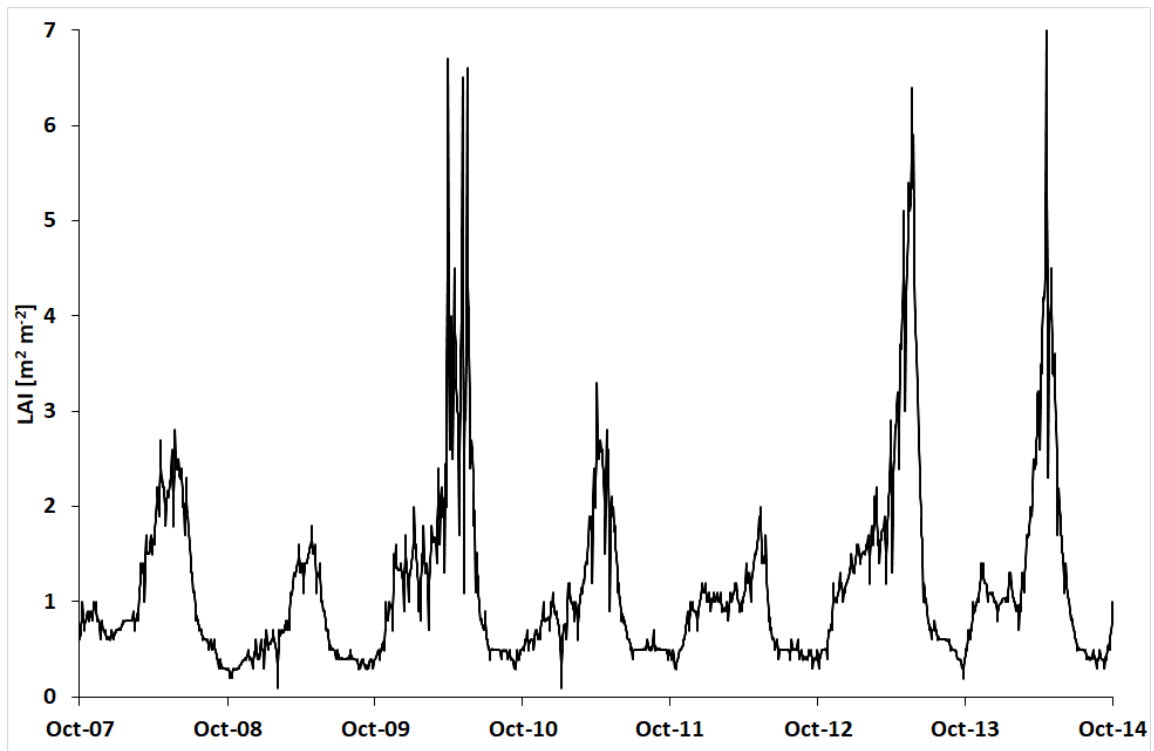

**Fig. S6** Daily LAI of the seven hydrological years (1 October 2007 – 30 September 2014) for the land-cover class “grass/bare soil”, as presented in Fig. 2 of the main article

### ESM References

Lubczynski, M. W., & Gurwin, J. (2005). Integration of various data sources for transient groundwater modeling with spatio-temporally variable fluxes—Sardon study case, Spain. *Journal of Hydrology*, *306*(1–4), 71–96.

<https://doi.org/10.1016/J.JHYDROL.2004.08.038>

Francés, A. P., Lubczynski, M. W., Roy, J., Santos, F. A. M., & Mahmoudzadeh Ardekani, M. R. (2014).

Hydrogeophysics and remote sensing for the design of hydrogeological conceptual models in hard rocks – Sardon catchment (Spain). *Journal of Applied Geophysics*, *110*, 63–81.

<https://doi.org/10.1016/J.JAPPGEO.2014.08.015>
